# Supplementary material for: Critique of Well Activity Proxy Uses Inadequate Data and Statistics
Source: Int J Environ Res Public Health. 2020 Aug 3;17(15):5597. doi: 10.3390/ijerph17155597 (PMC7432311; doi:10.3390/ijerph17155597)
Supplement: Supplementary file 1 [file ijerph-17-05597-s001.r]

# simple artificial data setup for testing Cohen's Kappa 
# statistic against stadard correlation model output
# written by GWS in January 2020

# load inter-rater reliability package
library(irr)

# elements of the test
# 1. create artificial data
# log-normally distributed (alternative: normally distributed)

x <- rlnorm(1000)
# 2. add white noise to this data to create 2nd data set, correlated to the 1st
y <- jitter(x, amount=2) + 2 # added amount is optional!
# "+2" avoids negative data points in this example since we assume air quality data
# versus WA metric data, which are both positive only

# 3. test the data correlations
# a) simple linear model
summary(lm(y ~ x))
# slope of near 1, intercept according to added "amount"
# strong correlation, r-sq ~= 0.8, as noise amount was ~= sd(x)

# b) arrange data into quartiles and redo 
q.x <- NULL
for (i in 1:length(x)) {
	if (x[i] >= quantile(x)[1] & x[i] < quantile(x)[2]) q.x <- c(q.x, 1)
	if (x[i] >= quantile(x)[2] & x[i] < quantile(x)[3]) q.x <- c(q.x, 2)
	if (x[i] >= quantile(x)[3] & x[i] < quantile(x)[4]) q.x <- c(q.x, 3)
	if (x[i] >= quantile(x)[4]) q.x <- c(q.x, 4)
	}

q.y <- NULL
for (i in 1:length(y)) {
	if (y[i] >= quantile(y)[1] & y[i] < quantile(y)[2]) q.y <- c(q.y, 1)
	if (y[i] >= quantile(y)[2] & y[i] < quantile(y)[3]) q.y <- c(q.y, 2)
	if (y[i] >= quantile(y)[3] & y[i] < quantile(y)[4]) q.y <- c(q.y, 3)
	if (y[i] >= quantile(y)[4]) q.y <- c(q.y, 4)
	}

summary(lm(q.y ~ q.x))
# still strongly correlated and highly significant, though intercept and slope have changed (!)

# Kappa statistic:
kappa2(cbind(q.x, q.y))
# kappa ~0.25, highly significant (p=0)

# 4. combine this into a test on correlated data with increasing white noise,
# tabulate, whereby columns are by white noise, rows depict statistics
tab <- NULL
for (j in 1:20) {
	x <- rlnorm(1000)
	y <- jitter(x, amount=j) + j
	q.x <- NULL
	quan <- quantile(x)
	for (i in 1:length(x)) {
		if (x[i] >= quan[1] & x[i] < quan[2]) q.x <- c(q.x, 1)
		if (x[i] >= quan[2] & x[i] < quan[3]) q.x <- c(q.x, 2)
		if (x[i] >= quan[3] & x[i] < quan[4]) q.x <- c(q.x, 3)
		if (x[i] >= quan[4]) q.x <- c(q.x, 4)
		}
	q.y <- NULL
	quan <- quantile(y)
	for (i in 1:length(y)) {
		if (y[i] >= quan[1] & y[i] < quan[2]) q.y <- c(q.y, 1)
		if (y[i] >= quan[2] & y[i] < quan[3]) q.y <- c(q.y, 2)
		if (y[i] >= quan[3] & y[i] < quan[4]) q.y <- c(q.y, 3)
		if (y[i] >= quan[4]) q.y <- c(q.y, 4)
		}
	tab <- cbind(tab, c(summary(lm(y ~ x))$r.sq, anova(lm(y ~ x))$'Pr(>F)'[1],  
		summary(lm(q.y ~ q.x))$r.sq, anova(lm(q.y ~ q.x))$'Pr(>F)'[1], 
		kappa2(cbind(q.x, q.y))$val, kappa2(cbind(q.x, q.y))$p) )
	}
# rename rows and columns:
dimnames(tab) <- list(c("raw_rsq", "raw_p", "quart_rsq", "quart_p", "kappa", "kappa_p"), c(1:20))

#####################
# optional:
# write the data to a csv-file
# round beforehand
tab <- round(tab, 4)
write.csv(tab, "C:\\Users\\[YOURUSERNAME]\\Desktop\\tab.csv")

# redo for normally distributed data
tab <- NULL
for (j in 1:20) {
	x <- rnorm(1000)
	y <- jitter(x, amount=j) + j
	q.x <- NULL
	quan <- quantile(x)
	for (i in 1:length(x)) {
		if (x[i] >= quan[1] & x[i] < quan[2]) q.x <- c(q.x, 1)
		if (x[i] >= quan[2] & x[i] < quan[3]) q.x <- c(q.x, 2)
		if (x[i] >= quan[3] & x[i] < quan[4]) q.x <- c(q.x, 3)
		if (x[i] >= quan[4]) q.x <- c(q.x, 4)
		}
	q.y <- NULL
	quan <- quantile(y)
	for (i in 1:length(y)) {
		if (y[i] >= quan[1] & y[i] < quan[2]) q.y <- c(q.y, 1)
		if (y[i] >= quan[2] & y[i] < quan[3]) q.y <- c(q.y, 2)
		if (y[i] >= quan[3] & y[i] < quan[4]) q.y <- c(q.y, 3)
		if (y[i] >= quan[4]) q.y <- c(q.y, 4)
		}
	tab <- cbind(tab, c(summary(lm(y ~ x))$r.sq, anova(lm(y ~ x))$'Pr(>F)'[1],  
		summary(lm(q.y ~ q.x))$r.sq, anova(lm(q.y ~ q.x))$'Pr(>F)'[1], 
		kappa2(cbind(q.x, q.y))$val, kappa2(cbind(q.x, q.y))$p) )
	}
# renames rows and columns
dimnames(tab) <- list(c("raw_rsq", "raw_p", "quart_rsq", "quart_p", "kappa", "kappa_p"), c(1:20))

# for nomally distrbuted data more "insignificant at the 95% level" results appear among the 
# quartile correlations, and especially among the kappa tests

######
# miscellaneous plots
# compare p-values in a plot:
windows()
# against the raw data correlation p-value
plot(tab[2,], tab[6,], log="xy", xlim=c(1e-55, 1))
abline(h=0.05)
# against the quartile correlation p-value
plot(tab[4,], tab[6,], log="xy", xlim=c(1e-55, 1))
abline(h=0.05)
# compare to the raw vs. quartile:
plot(tab[2,], tab[4,], log="xy")
abline(h=0.05)
abline(v=0.05)
